# Supplementary material
Source: PubMed Central journal article supplement (PMC2933145)
Supplement: NIHMS225474-supplement-1_si_001.pdf [file NIHMS225474-supplement-1_si_001.pdf]

**Table S1: Heme methyl  $^1\text{H}$  chemical shifts for *Ht* cyt *c*<sub>552</sub> in parts per million (ppm) at pH 7**

| Protein   | $^1\text{H}$ 1-CH <sub>3</sub> | $^1\text{H}$ 3-CH <sub>3</sub> | $^1\text{H}$ 5-CH <sub>3</sub> | $^1\text{H}$ 8-CH <sub>3</sub> | average |
|-----------|--------------------------------|--------------------------------|--------------------------------|--------------------------------|---------|
| wild-type | 18.1                           | 22.2                           | 22.8                           | 24.2                           | 21.8    |
| M13V      | 17.9                           | 20.7                           | 22.8                           | 23.8                           | 21.3    |
| K22M      | 18.4                           | 21.3                           | 23.2                           | 24.0                           | 21.7    |
| M13V/K22M | 18.0                           | 19.7                           | 23.1                           | 23.3                           | 21.0    |

**Table S2: Chemical shifts of His nuclei for *Ht* cyt *c*<sub>552</sub> as a function of pH**

| pH    | wild-type<br><sup>1</sup> H | wild-type<br><sup>15</sup> N | pH    | M13V<br><sup>1</sup> H | M13V<br><sup>15</sup> N | pH    | K22M<br><sup>1</sup> H | K22M<br><sup>15</sup> N | pH    | M13V/K22M<br><sup>1</sup> H | M13V/K22M<br><sup>15</sup> N |
|-------|-----------------------------|------------------------------|-------|------------------------|-------------------------|-------|------------------------|-------------------------|-------|-----------------------------|------------------------------|
| 5.60  | 13.2                        | 183.1                        | 6.97  | 11.83                  | 170.6                   | 6.55  | 12.62                  | 180.6                   | 5.30  | 11.17                       | 167.6                        |
| 6.25  | 13.2                        | 183.0                        | 7.00  | 11.83                  | 170.5                   | 7.03  | 12.63                  | 180.8                   | 5.85  | 11.18                       | 167.7                        |
| 6.70  | 13.2                        | 182.9                        | 7.56  | 11.84                  | 170.5                   | 7.50  | 12.64                  | 180.6                   | 6.70  | 11.19                       | 167.7                        |
| 6.95  | 13.2                        | 182.9                        | 8.01  | 11.85                  | 170.7                   | 7.96  | 12.66                  | 180.6                   | 7.05  | 11.20                       | 167.7                        |
| 6.97  | 13.2                        | 182.9                        | 8.53  | 11.87                  | 170.7                   | 8.21  | 12.66                  | 180.8                   | 7.52  | 11.20                       | 167.7                        |
| 7.40  | 13.2                        | 182.5                        | 9.03  | 11.92                  | 170.9                   | 8.22  | 12.66                  | 180.7                   | 8.05  | 11.23                       | 167.7                        |
| 7.94  | 13.2                        | 182.8                        | 9.42  | 11.98                  | 171.3                   | 8.67  | 12.69                  | 181.0                   | 8.65  | 11.25                       | 167.8                        |
| 8.55  | 13.3                        | 183.1                        | 9.78  | 12.05                  | 171.7                   | 8.95  | 12.73                  | 180.9                   | 9.10  | 11.29                       | 167.9                        |
| 9.10  | 13.4                        | 183.4                        | 9.84  | 12.15                  | 171.90                  | 9.43  | 12.80                  | 181.4                   | 9.47  | 11.34                       | 167.9                        |
| 9.67  | 13.5                        | 184.3                        | 10.23 | 12.17                  | 172.4                   | 9.97  | 13.05                  | 182.6                   | 9.93  | 11.45                       | 168.5                        |
| 9.96  | 13.6                        | 185.0                        | 10.61 | 12.37                  | 173.2                   | 10.01 | 13.06                  | 183.0                   | 10.10 | 11.51                       | 168.2                        |
| 10.38 | 13.8                        | 186.8                        | 11.07 | 12.50                  | 173.9                   | 10.40 | 13.21                  | 183.8                   | 10.45 | 11.65                       | 169.4                        |
| 10.53 | 14.0                        | 187.6                        | 11.16 | 12.54                  | 174.1                   | 10.80 | 13.45                  | 185.1                   | 10.92 | 11.87                       | 170.7                        |
| 10.95 | 14.0                        | 189.1                        | 11.34 | 12.59                  | 174.4                   | 11.49 | 13.46                  | 185.2                   | 11.08 | 12.17                       | 172.3                        |
| 11.11 | 14.1                        | 188.7                        | 11.48 | 12.6                   | 174.5                   | 11.94 | 13.93                  | 188.4                   | 11.42 | 12.17                       | 172.3                        |
| -     | -                           | -                            | 11.57 | 12.58                  | 174.5                   | -     | -                      | -                       | 12.15 | 12.30                       | 173.2                        |

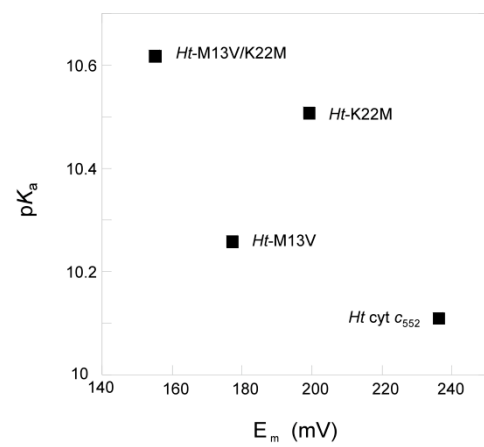

**Figure S1:** Plot of His 16  $pK_{a(2)}$  vs.  $E_m$

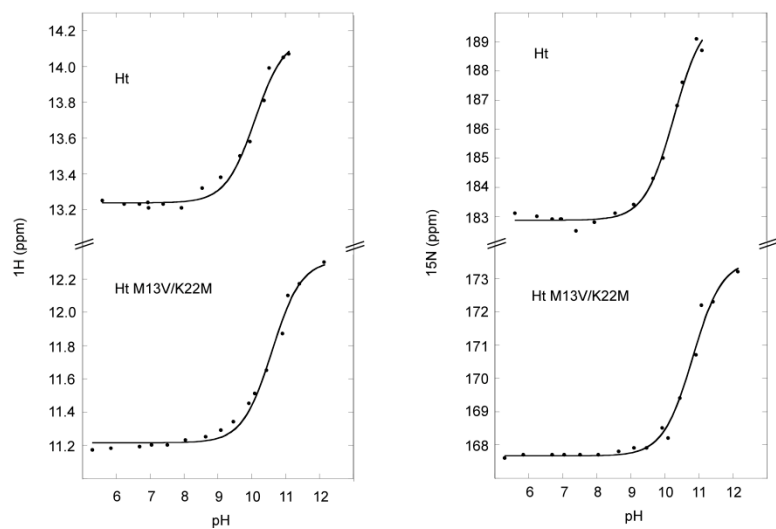

**Figure S2:** Representative fits of chemical shift vs. pH to determine  $\text{p}K_a$  for *Ht* cyt  $c_{552}$  wild-type and M13V/K22M. At pH values higher than those shown the cross-peak loses intensity and is difficult to observe.
